# Supplementary material for: Mortality from cerebrovascular diseases in China: Exploration of recent and future trends
Source: PubMed Central journal article supplement — Chin Med J (Engl). 2023 Jul 7;137(5):588–95. doi: 10.1097/CM9.0000000000002760 (PMC10932538; doi:10.1097/cm9.0000000000002760), 2023-07-07
Supplement: cm9-137-588-s001.pdf [file cm9-137-588-s001.pdf]

## Supplementary Materials

### ICD Cerebrovascular diseases I60–I69

---

#### I60 Nontraumatic subarachnoid hemorrhage

I60.0 Nontraumatic subarachnoid hemorrhage from carotid siphon and bifurcation

I60.1 Nontraumatic subarachnoid hemorrhage from middle cerebral artery

I60.2 Nontraumatic subarachnoid hemorrhage from anterior communicating artery

I60.3 Nontraumatic subarachnoid hemorrhage from posterior communicating artery

I60.4 Nontraumatic subarachnoid hemorrhage from basilar artery

I60.5 Nontraumatic subarachnoid hemorrhage from vertebral artery

I60.6 Nontraumatic subarachnoid hemorrhage from other intracranial arteries

I60.7 Nontraumatic subarachnoid hemorrhage from unspecified intracranial artery

I60.8 Other nontraumatic subarachnoid hemorrhage

I60.9 Nontraumatic subarachnoid hemorrhage, unspecified

#### I61 - Nontraumatic intracerebral hemorrhage

#### I61 Nontraumatic intracerebral hemorrhage

I61.0 Nontraumatic intracerebral hemorrhage in hemisphere, subcortical

I61.1 Nontraumatic intracerebral hemorrhage in hemisphere, cortical

I61.2 Nontraumatic intracerebral hemorrhage in hemisphere, unspecified

---

- I61.3 Nontraumatic intracerebral hemorrhage in brain stem
- I61.4 Nontraumatic intracerebral hemorrhage in cerebellum
- I61.5 Nontraumatic intracerebral hemorrhage, intraventricular
- I61.6 Nontraumatic intracerebral hemorrhage, multiple localized
- I61.8 Other nontraumatic intracerebral hemorrhage
- I61.9 Nontraumatic intracerebral hemorrhage, unspecified

I62 - Other and unspecified nontraumatic intracranial hemorrhage

I62 Other and unspecified nontraumatic intracranial hemorrhage

- I62.0 Nontraumatic subdural hemorrhage
- I62.1 Nontraumatic extradural hemorrhage
- I62.9 Nontraumatic intracranial hemorrhage, unspecified

I63 - Cerebral infarction

I63 Cerebral infarction

- I63.0 Cerebral infarction due to thrombosis of precerebral arteries
  - I63.1 Cerebral infarction due to embolism of precerebral arteries
  - I63.2 Cerebral infarction due to unspecified occlusion or stenosis of precerebral arteries
  - I63.3 Cerebral infarction due to thrombosis of cerebral arteries
  - I63.4 Cerebral infarction due to embolism of cerebral arteries
  - I63.5 Cerebral infarction due to unspecified occlusion or stenosis of cerebral arteries
  - I63.6 Cerebral infarction due to cerebral venous thrombosis, nonpyogenic
  - I63.8 Other cerebral infarction
  - I63.9 Cerebral infarction, unspecified
-

I65 - Occlusion and stenosis of precerebral arteries, not resulting in cerebral infarction

I65 Occlusion and stenosis of precerebral arteries, not resulting in cerebral infarction

I65.0 Occlusion and stenosis of vertebral artery

I65.1 Occlusion and stenosis of basilar artery

I65.2 Occlusion and stenosis of carotid artery

I65.8 Occlusion and stenosis of other precerebral arteries

I65.9 Occlusion and stenosis of unspecified precerebral artery

I66 - Occlusion and stenosis of cerebral arteries, not resulting in cerebral infarction

I66 Occlusion and stenosis of cerebral arteries, not resulting in cerebral infarction

I66.0 Occlusion and stenosis of middle cerebral artery

I66.1 Occlusion and stenosis of anterior cerebral artery

I66.2 Occlusion and stenosis of posterior cerebral artery

I66.3 Occlusion and stenosis of cerebellar arteries

I66.8 Occlusion and stenosis of other cerebral arteries

I66.9 Occlusion and stenosis of unspecified cerebral artery

I67 - Other cerebrovascular diseases

I67 Other cerebrovascular diseases

I67.0 Dissection of cerebral arteries, nonruptured

I67.1 Cerebral aneurysm, nonruptured

I67.2 Cerebral atherosclerosis

I67.3 Progressive vascular leukoencephalopathy

---

I67.4 Hypertensive encephalopathy

I67.5 Moyamoya disease

I67.6 Nonpyogenic thrombosis of intracranial venous system

I67.7 Cerebral arteritis, not elsewhere classified

I67.8 Other specified cerebrovascular diseases

I67.9 Cerebrovascular disease, unspecified

I68 - Cerebrovascular disorders in diseases classified elsewhere

I68 Cerebrovascular disorders in diseases classified elsewhere

I68.0 Cerebral amyloid angiopathy

I68.2 Cerebral arteritis in other diseases classified elsewhere

I68.8 Other cerebrovascular disorders in diseases classified elsewhere

I69 - Sequelae of cerebrovascular disease

I69 Sequelae of cerebrovascular disease

I69.0 Sequelae of nontraumatic subarachnoid hemorrhage

I69.1 Sequelae of nontraumatic intracerebral hemorrhage

I69.2 Sequelae of other nontraumatic intracranial hemorrhage

I69.3 Sequelae of cerebral infarction

I69.8 Sequelae of other cerebrovascular diseases

I69.9 Sequelae of unspecified cerebrovascular diseases

---

ICD: International Classification of Diseases.

**Supplementary Table 1: Age-specific CVD mortality rates stratified by residence and sex in 2019.**

---

| Age group | All areas |      |      | Urban areas |      |      | Rural areas |      |      |
|-----------|-----------|------|------|-------------|------|------|-------------|------|------|
|           | Both      | Male | Fema | Both        | Male | Fema | Both        | Male | Fema |

---

| <b>p</b><br><b>(years)</b> | <b>le</b> |        |       | <b>le</b> |        |       | <b>le</b> |        |        |
|----------------------------|-----------|--------|-------|-----------|--------|-------|-----------|--------|--------|
| 0–                         | 0.16      | 0.24   | 0.07  | 0         | 0      | 0     | 0.24      | 0.36   | 0.10   |
| 1–4                        | 0         | 0      | 0     | 0         | 0      | 0     | 0         | 0      | 0      |
| 5–9                        | 0.13      | 0.12   | 0.13  | 0.19      | 0.31   | 0.05  | 0.10      | 0.05   | 0.16   |
| 10–14                      | 0.21      | 0.27   | 0.15  | 0.30      | 0.35   | 0.25  | 0.18      | 0.24   | 0.10   |
| 15–19                      | 0.90      | 1.16   | 0.61  | 0.71      | 0.78   | 0.63  | 0.99      | 1.32   | 0.60   |
| 20–24                      | 1.19      | 1.73   | 0.60  | 0.79      | 1.03   | 0.54  | 1.41      | 2.11   | 0.63   |
| 25–29                      | 1.95      | 2.88   | 0.96  | 1.24      | 1.74   | 0.69  | 2.40      | 3.60   | 1.13   |
| 30–34                      | 4.58      | 7.10   | 2.12  | 2.97      | 4.50   | 1.47  | 5.56      | 8.67   | 2.52   |
| 35–39                      | 8.76      | 14.10  | 3.39  | 6.18      | 10.06  | 2.30  | 10.23     | 16.40  | 4.01   |
| 40–44                      | 17.09     | 26.32  | 7.70  | 13.05     | 20.14  | 5.78  | 19.28     | 29.70  | 8.74   |
| 45–49                      | 30.79     | 45.38  | 15.96 | 26.05     | 39.28  | 12.40 | 33.16     | 48.47  | 17.72  |
| 50–54                      | 55.78     | 78.95  | 32.51 | 41.34     | 59.61  | 22.49 | 63.82     | 89.94  | 37.96  |
| 55–59                      | 95.18     | 134.34 | 55.67 | 77.52     | 115.33 | 39.25 | 105.02    | 144.97 | 64.80  |
| 60–64                      | 154.92    | 211.47 | 97.73 | 129.41    | 183.53 | 75.05 | 168.31    | 226.05 | 109.70 |
| 65–6                       | 301.3     | 394.7  | 211.9 | 248.5     | 337.2  | 164.8 | 327.5     | 422.9  | 235.4  |

|      |       |       |       |       |       |       |       |       |       |
|------|-------|-------|-------|-------|-------|-------|-------|-------|-------|
| 9    | 8     | 9     | 0     | 5     | 0     | 4     | 0     | 5     | 1     |
| 70–7 | 606.5 | 752.1 | 468.6 | 473.2 | 603.6 | 353.3 | 675.7 | 827.4 | 529.7 |
| 4    | 8     | 9     | 1     | 6     | 6     | 3     | 3     | 4     | 3     |
| 75–7 | 1159. | 1378. | 961.9 | 929.1 | 1120. | 762.5 | 1286. | 1517. | 1075. |
| 9    | 58    | 92    | 2     | 3     | 85    | 0     | 97    | 41    | 12    |
| 80–8 | 1938. | 2278. | 1671. | 1619. | 1818. | 1455. | 2121. | 2553. | 1791. |
| 4    | 47    | 60    | 46    | 67    | 98    | 39    | 24    | 66    | 19    |
| 85+  | 4611. | 4872. | 4433. | 4337. | 4516. | 4208. | 4764. | 5080. | 4555. |
|      | 32    | 61    | 66    | 04    | 28    | 85    | 24    | 80    | 04    |

CVD: Cerebrovascular disease. Mortality rate = 1 per 100,000 individuals.

**Supplementary Table 2: Age-specific mortality rates of CVD stratified by region and sex in 2019.**

| Age group (years) | Eastern region |      |        | Central region |      |        | Western region |      |        |
|-------------------|----------------|------|--------|----------------|------|--------|----------------|------|--------|
|                   | Both           | Male | Female | Both           | Male | Female | Both           | Male | Female |
| 0–                | 0.25           | 0.31 | 0.17   | 0.10           | 0.18 | 0      | 0.12           | 0.23 | 0      |
| 1–4               | 0              | 0    | 0      | 0              | 0    | 0      | 0              | 0    | 0      |
| 5–9               | 0.13           | 0.11 | 0.16   | 0.09           | 0.10 | 0.08   | 0.17           | 0.18 | 0.15   |
| 10–14             | 0.33           | 0.36 | 0.29   | 0.10           | 0.14 | 0.04   | 0.22           | 0.33 | 0.09   |
| 15–19             | 0.90           | 1.07 | 0.69   | 0.59           | 0.68 | 0.47   | 1.23           | 1.74 | 0.65   |
| 20–24             | 0.91           | 1.19 | 0.59   | 1.03           | 1.48 | 0.54   | 1.77           | 2.77 | 0.68   |
| 25–29             | 1.41           | 2.13 | 0.62   | 1.96           | 2.86 | 1.02   | 2.85           | 4.13 | 1.45   |

|       |         |         |         |         |         |         |         |         |         |
|-------|---------|---------|---------|---------|---------|---------|---------|---------|---------|
| 30–34 | 3.75    | 6.07    | 1.47    | 5.05    | 7.45    | 2.76    | 5.35    | 8.33    | 2.34    |
| 35–39 | 7.70    | 12.45   | 2.93    | 8.89    | 14.36   | 3.48    | 10.12   | 16.15   | 3.94    |
| 40–44 | 14.46   | 22.20   | 6.68    | 18.19   | 28.48   | 7.84    | 19.24   | 29.10   | 8.92    |
| 45–49 | 23.85   | 35.74   | 11.87   | 33.57   | 49.99   | 17.15   | 37.26   | 53.23   | 20.46   |
| 50–54 | 41.70   | 59.46   | 23.94   | 62.95   | 89.05   | 37.04   | 69.62   | 97.66   | 40.77   |
| 55–59 | 75.12   | 107.61  | 42.47   | 113.45  | 160.95  | 65.92   | 106.83  | 146.67  | 65.92   |
| 60–64 | 134.58  | 187.31  | 81.45   | 176.56  | 241.69  | 110.78  | 159.16  | 210.32  | 107.02  |
| 65–69 | 248.12  | 334.02  | 166.56  | 350.36  | 457.00  | 247.93  | 326.62  | 414.05  | 241.87  |
| 70–74 | 522.84  | 660.11  | 394.13  | 693.95  | 865.70  | 530.25  | 626.24  | 749.93  | 507.93  |
| 75–79 | 941.45  | 1129.04 | 775.32  | 1310.38 | 1561.43 | 1080.42 | 1351.22 | 1577.97 | 1144.98 |
| 80–84 | 1653.20 | 1988.96 | 1403.12 | 2208.18 | 2598.82 | 1898.05 | 2155.06 | 2405.45 | 1939.22 |
| 85+   | 4393.37 | 4554.87 | 4286.73 | 4849.75 | 5059.16 | 4700.90 | 4723.90 | 5253.53 | 4365.05 |

CVD: Cerebrovascular disease. Mortality rate = 1 per 100,000 individuals.

### Supplementary Figure 1

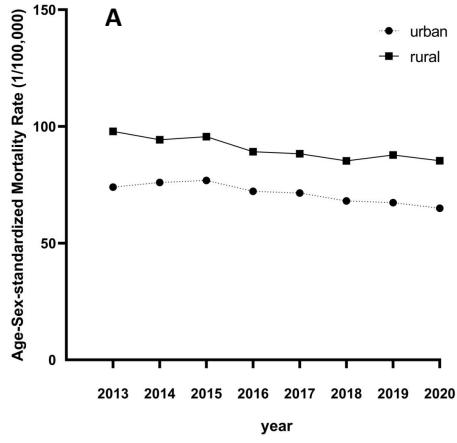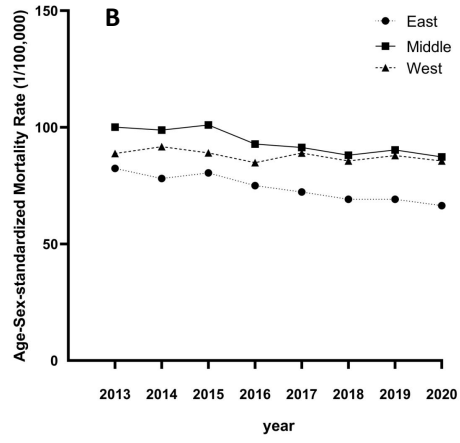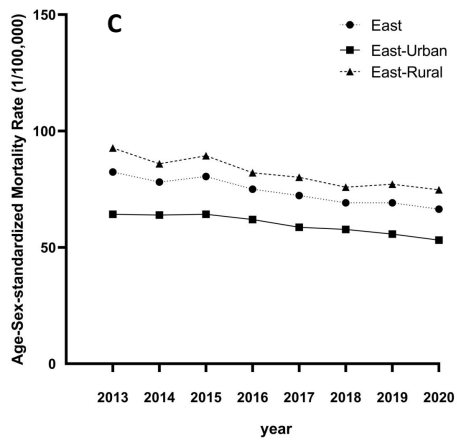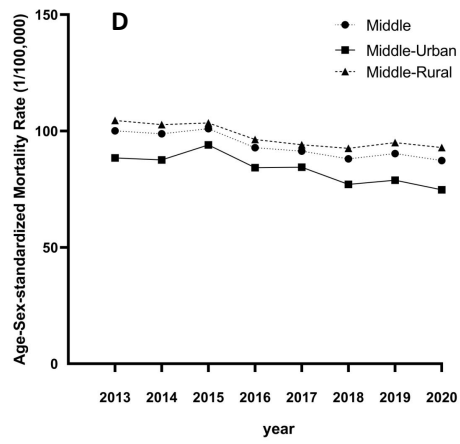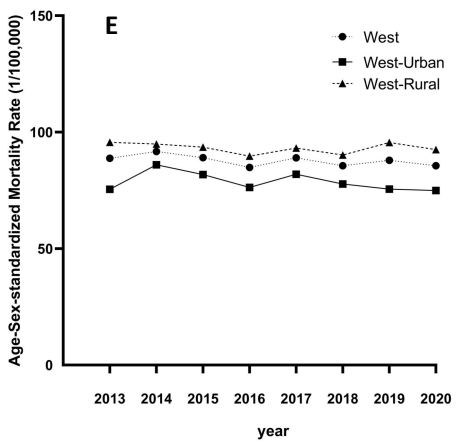



**Supplementary Figure 1:** Trends in Age-Sex standardized mortality by residence and region from 2013 to 2020. (A) Age-sex standardized mortality rate for urban and rural areas, 2013-2020; (B) Age-sex standardized mortality rate for different regions, 2013-2020; (C) Age-sex standardized mortality rate for urban and rural areas in East China, 2013-2020; (D) Age-sex standardized mortality rate for urban and rural areas in Middle China, 2013-2020; (E) Age-sex standardized mortality rate for urban and rural areas in West China, 2013-2020. Jointpoint regression analysis showed that Urban area and East-Urban area had one jointpoint in 2015; however, only the APC from 2015 to 2020 were statistically significant. The Western, Western-Urban and Western-Rural Region maintained stability in the Age-Sex standardized CVD mortality rate from 2013 to 2020. The remaining regions all show a downward trend in Age-Sex standardized CVD mortality. APC: Annual percentage changes; CVD: Cerebrovascular disease.

**Supplementary Table 3: APC of age–sex standardized mortality of CVD.**

| Cohort     | Segment | Lower endpoint | Upper endpoint | APC   | Lower CI | Upper CI | Test statistic (t) | Prob. >  t |
|------------|---------|----------------|----------------|-------|----------|----------|--------------------|------------|
| Urban – 1  | 1       | 2013           | 2015           | 1.1   | –3.6     | 5.9      | 0.7                | 0.522      |
| Urban – 1  | 2       | 2015           | 2020           | –3.2* | –4.2     | –2.2     | –9.8               | 0.002      |
| Rural – 0  | 1       | 2013           | 2020           | –2.0* | –2.8     | –1.1     | –5.8               | 0.001      |
| East – 0   | 1       | 2013           | 2020           | –3.1* | –3.8     | –2.3     | –9.8               | <0.001     |
| Middle – 0 | 1       | 2013           | 2020           | –2.2* | –3.1     | –1.2     | –5.7               | 0.001      |
| West – 0   | 1       | 2013           | 2020           | –0.6  | –1.5     | 0.2      | –1.8               | 0.116      |

|                                    |   |      |      |       |      |      |       |        |
|------------------------------------|---|------|------|-------|------|------|-------|--------|
| East-Urban –<br>1 Joinpoint        | 1 | 2013 | 2015 | -0.1  | -4.7 | 4.6  | -0.1  | 0.939  |
| East-Urban –<br>1 Joinpoint        | 2 | 2015 | 2020 | -3.6* | -4.6 | -2.6 | -11.2 | 0.002  |
| East-Rural –<br>0 Joinpoints       | 1 | 2013 | 2020 | -3.0* | -4   | -2   | -7.2  | <0.001 |
| Middle-Urba<br>n – 0<br>Joinpoints | 1 | 2013 | 2020 | -2.7* | -4.2 | -1.2 | -4.3  | 0.005  |
| Middle-Rural<br>– 0<br>Joinpoints  | 1 | 2013 | 2020 | -1.9* | -2.7 | -1   | -5.1  | 0.002  |
| West-Urban<br>– 0<br>Joinpoints    | 1 | 2013 | 2020 | -0.9  | -2.7 | 0.9  | -1.2  | 0.262  |
| West-Rural –<br>0 Joinpoints       | 1 | 2013 | 2020 | -0.3  | -1.3 | 0.6  | -0.8  | 0.443  |

APC: Annual percent change; CI: Confidence interval; CVD: Cerebrovascular disease.

\*Statistically significant.

**Supplementary Table 4: AAPC of age–sex standardized mortality of CVD.**

| Cohort                  | Range         | Lower<br>endpoint | Upper<br>endpoint | AAPC  | Lower<br>CI | Upper<br>CI | Test<br>statistic~ | P-value |
|-------------------------|---------------|-------------------|-------------------|-------|-------------|-------------|--------------------|---------|
| Urban – 1<br>Joinpoint  | Full<br>range | 2013              | 2020              | -2.0* | -2.9        | -1.1        | -4.2               | <0.001  |
| Rural – 0<br>Joinpoints | Full<br>range | 2013              | 2020              | -2.0* | -2.8        | -1.1        | -5.8               | 0.001   |
| East – 0                | Full          | 2013              | 2020              | -3.1* | -3.8        | -2.3        | -9.8               | <0.001  |

|                |       |      |      |       |      |      |      |        |  |
|----------------|-------|------|------|-------|------|------|------|--------|--|
| Joinpoints     | range |      |      |       |      |      |      |        |  |
| Middle – 0     | Full  | 2013 | 2020 | -2.2* | -3.1 | -1.2 | -5.7 | 0.001  |  |
| Joinpoints     | range |      |      |       |      |      |      |        |  |
| West – 0       | Full  | 2013 | 2020 | -0.6  | -1.5 | 0.2  | -1.8 | 0.116  |  |
| Joinpoints     | range |      |      |       |      |      |      |        |  |
| East-Urban –   | Full  | 2013 | 2020 | -2.6* | -3.5 | -1.7 | -5.5 | <0.001 |  |
| 1 Joinpoint    | range |      |      |       |      |      |      |        |  |
| East-Rural –   | Full  | 2013 | 2020 | -3.0* | -4   | -2   | -7.2 | <0.001 |  |
| 0 Joinpoints   | range |      |      |       |      |      |      |        |  |
| Middle-Urban   | Full  | 2013 | 2020 | -2.7* | -4.2 | -1.2 | -4.3 | 0.005  |  |
| – 0 Joinpoints | range |      |      |       |      |      |      |        |  |
| Middle-Rural   | Full  | 2013 | 2020 | -1.9* | -2.7 | -1   | -5.1 | 0.002  |  |
| – 0 Joinpoints | range |      |      |       |      |      |      |        |  |
| West-Urban –   | Full  | 2013 | 2020 | -0.9  | -2.7 | 0.9  | -1.2 | 0.262  |  |
| 0 Joinpoints   | range |      |      |       |      |      |      |        |  |
| West-Rural –   | Full  | 2013 | 2020 | -0.3  | -1.3 | 0.6  | -0.8 | 0.443  |  |
| 0 Joinpoints   | range |      |      |       |      |      |      |        |  |

AAPC: Average annual percent change; CI: Confidence interval; CVD: Cerebrovascular disease. \*Statistically significant.

**Supplementary Table 5: CVD mortality rates (1/10<sup>5</sup>) in 2020 and the projection for 2020, stratified by age, sex, urban–rural residential setting, and regional classification using cause of death monitoring datasets of China.**

| Characteristics   | 2020        |                      |                          |
|-------------------|-------------|----------------------|--------------------------|
|                   | No.         | Rate (95% CI)        | Projection rate (95% CI) |
| Total             | 278,517,860 |                      |                          |
| Crude             | 430,007     | 154.4 (153.9, 154.9) | 150.9 (150.7, 151.2)     |
| Age adjusted*     |             | 108.3 (108.1, 108.5) | 110.4 (110.2, 110.6)     |
| Age group (years) |             |                      |                          |

|              |         |                         |                         |
|--------------|---------|-------------------------|-------------------------|
| ≤34          | 1741    | 1.5 (1.4, 1.6)          | 1.4 (1.3, 1.5)          |
| 35–44        | 5179    | 13.5 (13.1, 13.8)       | 12.3 (12.1, 12.5)       |
| 45–54        | 21,385  | 43.1 (42.6, 43.7)       | 42.6 (42.4, 42.8)       |
| 55–64        | 44,122  | 120.4 (119.3, 121.6)    | 121.8 (121.6, 122.0)    |
| 65–74        | 101,820 | 411.8 (409.3, 414.3)    | 402.7 (402.5, 402.9)    |
| 75–84        | 150,083 | 1482.4 (1474.9, 1489.8) | 1443.1 (1443.0, 1443.3) |
| ≥85          | 105,677 | 3966.2 (3942.8, 3989.7) | 4706.8 (4706.6, 4707.0) |
| Sex*         |         |                         |                         |
| Male         | 241,217 | 134.1 (133.9, 134.3)    | 134.4 (134.2, 134.6)    |
| Female       | 188,790 | 84.8 (84.6, 85.0)       | 87.7 (87.5, 87.9)       |
| Urban–rural* |         |                         |                         |
| Urban        | 132,006 | 90.4 (90.1, 90.7)       | 92.7 (92.5, 93.0)       |
| Rural        | 298,001 | 118.5 (118.3, 118.7)    | 120.0 (119.8, 120.2)    |
| Region*      |         |                         |                         |
| East         | 162,001 | 92.4 (92.1, 92.6)       | 94.2 (94.0, 94.4)       |
| Central      | 156,541 | 121.3 (121.1, 121.5)    | 123.3 (123.1, 123.5)    |
| West         | 111,465 | 119.2 (119.0, 119.4)    | 122.5 (122.3, 122.7)    |

ASR: Age-standardized rate; CI: Confidence interval; CVD: Cerebrovascular disease; CDC-DSP: Chinese Center for Disease Control and Prevention’s Disease Surveillance Points.

The number indicates the number of absolute deaths due to CVD recorded in the CDC-DSP.

Rate = 1 per 100,000 individuals.

\*Indicates the ASR standardized to the Chinese population according to the 2010 census.
